# Supplementary material for: Expanding or defending legitimacy? Why international organizations intensify self-legitimation
Source: Springer Nature journal article supplement (doi:10.1007/s11558-023-09498-0), 2023-07-24
Supplement: MOESM1 [file 11558_2023_9498_MOESM1_ESM.pdf]

# Appendix

## Expanding or defending legitimacy? Why international organizations intensify self-legitimation

Henning Schmidtke

*GIGA German Institute for Global and Area Studies, Germany*

*Minda de Gunzburg Center for European Studies (CES), Harvard University, United States*

Tobias Lenz

*Leuphana University of Lüneburg, Germany*

*GIGA German Institute for Global and Area Studies, Germany*

May 2023

This appendix presents the sample of IOs, details the operationalization of variables, and shows alternative models that we do not offer in full in the paper.

### Table of Contents

|                                                                    |    |
|--------------------------------------------------------------------|----|
| <b>A1 Sample of international organizations</b> .....              | 1  |
| <b>A2 Operationalization of variables</b> .....                    | 2  |
| <i>A2.1 Dependent variable (self-legitimation intensity)</i> ..... | 2  |
| Coded documents and coding unit.....                               | 2  |
| Identifying a legitimation statement .....                         | 2  |
| Identifying normative standards .....                              | 3  |
| Construction of dependent variable .....                           | 4  |
| Distribution of dependent variable.....                            | 5  |
| <i>A2.2 Independent variables</i> .....                            | 5  |
| <i>A2.3 Controls</i> .....                                         | 6  |
| <b>A3 Correlation matrix</b> .....                                 | 7  |
| <b>A4 Robustness checks</b> .....                                  | 8  |
| <b>References</b> .....                                            | 17 |

## A1 Sample of international organizations

| Acronym               | Name                                                 | Inception<br>(years in the sample) |
|-----------------------|------------------------------------------------------|------------------------------------|
| <b>Africa</b>         |                                                      |                                    |
| AU/OAU                | Organization of African Unity/African Union          | 1963 (40)                          |
| CEMAC                 | Central African Economic and Monetary Union          | 1994 (26)                          |
| COMESA                | Common Market for Eastern and Southern Africa        | 1994 (26)                          |
| EAC                   | East African Community                               | 1996 (24)                          |
| ECOWAS                | Economic Community of West African States            | 1975 (40)                          |
| IGAD                  | Inter-Governmental Authority on Development          | 1986 (34)                          |
| SACU                  | Southern African Customs Union                       | 2002 (18)                          |
| SADC                  | Southern African Development Community               | 1980 (40)                          |
| <b>Asia-Pacific</b>   |                                                      |                                    |
| ASEAN                 | Association of Southeast Asian Nations               | 1967 (40)                          |
| GCC                   | Gulf Cooperation Council                             | 1981 (39)                          |
| PIF                   | Pacific Island Forum                                 | 1973 (40)                          |
| SAARC                 | South Asia Association for Regional Cooperation      | 1985 (35)                          |
| SCO                   | Shanghai Cooperation Organization                    | 2001 (19)                          |
| <b>Americas</b>       |                                                      |                                    |
| CAN                   | Andean Pact/Andean Community                         | 1969 (40)                          |
| CARICOM               | Caribbean Community                                  | 1968 (40)                          |
| Mercosur              | Common Market of the South                           | 1991 (40)                          |
| OAS                   | Organization of American States                      | 1951 (40)                          |
| OECS                  | Organization of Eastern Caribbean States             | 1982 (38)                          |
| SICA                  | Central American Integration System                  | 1952 (40)                          |
| <b>Europe</b>         |                                                      |                                    |
| EFTA                  | European Free Trade Association                      | 1960 (40)                          |
| EU                    | European Union                                       | 1952 (40)                          |
| NordC                 | Nordic Council                                       | 1952 (40)                          |
| COE                   | Council of Europe                                    | 1949 (40)                          |
| <b>Cross-Regional</b> |                                                      |                                    |
| APEC                  | Asia-Pacific Economic Cooperation                    | 1991 (29)                          |
| CIS                   | Commonwealth of Independent States                   | 1991 (29)                          |
| LoAS                  | League of Arab States                                | 1945 (40)                          |
| OAPEC                 | Organization of Arab Petroleum Exporting Countries   | 1968 (40)                          |
| OSCE                  | Organization for Security and Co-operation in Europe | 1992 (28)                          |

## **A2 Operationalization of variables**

### *A2.1 Dependent variable (self-legitimation intensity)*

We measure self-legitimation intensity with the help of data generated in a large data-gathering effort within the research project LegRO (Schmidtke et al. 2023). As detailed in the codebook, we tested data reliability for the identification of legitimation statements and the coding of all variables.<sup>1</sup> Reliability tests build on a random sample of approximately five percent of the corpus. For all steps of the coding process, we achieved a Krippendorff's  $\alpha$  of 0.669 or higher.

#### Coded documents and coding unit

We analyze IO annual reports and communiqués of meetings of heads of state and government. For each document, we apply a sampling procedure by which we select a specific number of paragraphs – our coding unit – for coding. We focus on those sections in the respective documents that are particularly interesting from a legitimation perspective because they are rich in expressions of commitments to basic principles, key elements of the organization's philosophy, the organization's conception of itself, and its desired public image. The sections are easily identified as general overviews, summaries, forewords, introductions, and conclusions. They are typically found at the beginning and end of documents. Since the number of paragraphs in the selected sections varies across organizations, we calculate a 25 percent range around the mean number of paragraphs in these sections. As a result, we code a minimum of 16 and a maximum of 28 paragraphs per document. Given that we use two types of documents per IO year, the self-legitimation of an IO each year is represented by a minimum of 32 and a maximum of 56 paragraphs.<sup>2</sup>

#### Identifying a legitimation statement

In the first step of the coding process, we decided whether a paragraph makes a legitimation statement based on a stylized legitimation grammar. This grammar takes two different forms. The first one (OES) assumes that legitimation requires a normative assessment of an IO, which contains one necessary and one sufficient component. The necessary component is a positive evaluation (E) of the IO, its core bodies, the entirety of

---

<sup>1</sup> For more information on the project and the codebook, see (Lenz et al. 2022).

<sup>2</sup> For some IO years, we were not able to obtain both types of documents. For these years, an IO year is generally represented by a minimum of 16 and a maximum of 28 paragraphs. In some cases, entire documents are shorter than the minimum.

member states, or a core work program (O). The sufficient component is a normative standard (S) explaining why the IO is legitimate. This leads to the following grammar:

The [object of legitimation (O)] is legitimate [normative evaluation (E)]  
because [normative standard (S)].

The second grammar (OIS) follows the idea that legitimation can also express identity as a commitment to the normative standard.

The [object of legitimation (O) = RO as a whole] is committed [expression of  
identity (I)] to [normative standard (S)].

### Identifying standards of legitimation

In the next step, we identify the normative standards highlighted in self-legitimation statements. We operate with a typology that distinguishes legitimation standards along two core dimensions: *normative* and *institutional* (for a similar approach, see Binder and Heupel 2021; Dellmuth et al. 2019; Dingwerth et al. 2019; Schneider et al. 2010; Tallberg and Zürn 2019). We differentiate technocratic, liberal, and communitarian norms within the normative dimension. The institutional dimension includes procedures, performance, and purpose. The resulting typology constitutes the basic portfolio of normative standards from which IOs draw to justify their authority. As the table below shows, we further distinguish specific normative standards within these nine cells. For example, we differentiate between economic welfare, peace and security, international influence, and functional capability within the category of functional-performance self-legitimation. Apart from the standards that fall into this typology, we code two standards that do not highlight a specific institutional dimension: “external recognition” and “structural necessity.” Finally, we have a residual category for legitimation standards that do not specify the standard that underpins legitimation statements or that cannot be allocated to one of the cells of the typology (“other”)

The generalized justification of an IO’s authority must highlight a unique normative standard to qualify as a distinct legitimation statement. Consequently, we counted one legitimation statement per highlighted standard but no additional statement(s) if a standard appears multiple times.

## Standards of legitimation

|                         | <b>Procedure</b>                                                                                                     | <b>Performance</b>                                                                                                                                                                                       | <b>Purpose</b>                                                                                                                                                                                           |
|-------------------------|----------------------------------------------------------------------------------------------------------------------|----------------------------------------------------------------------------------------------------------------------------------------------------------------------------------------------------------|----------------------------------------------------------------------------------------------------------------------------------------------------------------------------------------------------------|
| <b>Technocracy</b>      | <ul style="list-style-type: none"> <li>• Functional capability</li> </ul>                                            | <ul style="list-style-type: none"> <li>• Economic welfare</li> <li>• Peace and security</li> <li>• International influence</li> <li>• Functional capability</li> </ul>                                   | <ul style="list-style-type: none"> <li>• Economic welfare</li> <li>• Peace and security</li> <li>• International influence</li> <li>• Functional capability</li> </ul>                                   |
| <b>Liberalism</b>       | <ul style="list-style-type: none"> <li>• Democracy (within the IO)</li> <li>• Rule of law (within the IO)</li> </ul> | <ul style="list-style-type: none"> <li>• Democracy (within and between states)</li> <li>• Rule of law (within and between states)</li> <li>• Human rights</li> <li>• Environmental protection</li> </ul> | <ul style="list-style-type: none"> <li>• Democracy (within and between states)</li> <li>• Rule of law (within and between states)</li> <li>• Human rights</li> <li>• Environmental protection</li> </ul> |
| <b>Communitarianism</b> | <ul style="list-style-type: none"> <li>• National sovereignty</li> <li>• Community/identity</li> </ul>               | <ul style="list-style-type: none"> <li>• National sovereignty</li> <li>• Political community</li> <li>• Economic community</li> </ul>                                                                    | <ul style="list-style-type: none"> <li>• National sovereignty</li> <li>• Political community</li> <li>• Economic community</li> </ul>                                                                    |
| <b>Other</b>            | Structural necessity, External recognition, Other                                                                    |                                                                                                                                                                                                          |                                                                                                                                                                                                          |

### Construction of dependent variable

Building on this coding effort, we construct the dependent variable – self-legitimation intensity – by dividing the number of identified legitimation statements by the number of coded paragraphs. Finally, since the annual scores of self-legitimation intensity are relatively sensitive to individual coder decisions and the drafting process of the analyzed documents, we use a two-year rolling mean in the estimations.

## Distribution of dependent variable

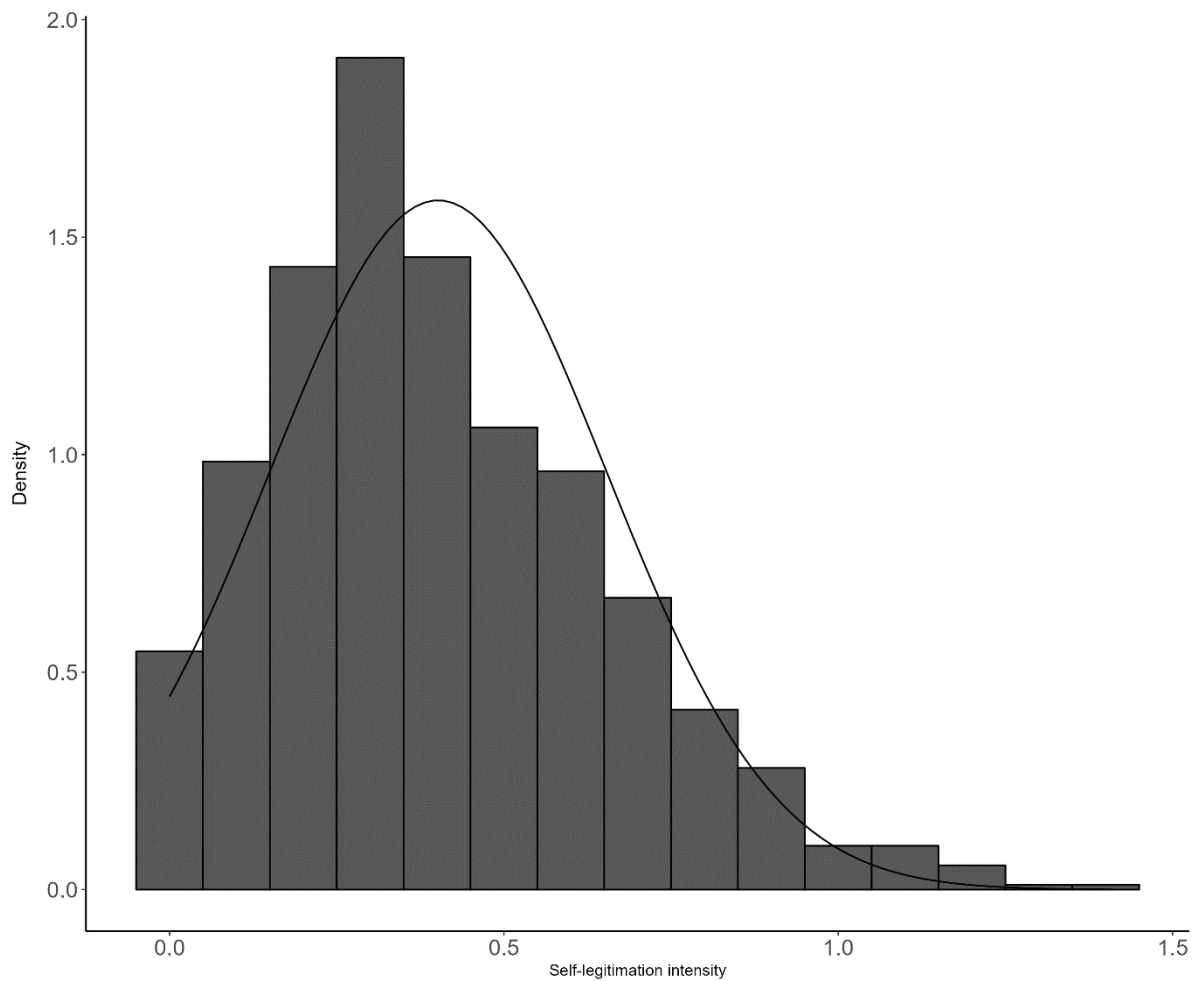

### *A2.2 Independent variables*

*Pooling.* We use an updated version of the Measure of International Authority (MIA) dataset provided by Hooghe et al. (2017) and updated for 2011 to 2019 by Haftel and Lenz (2022). This dataset provides an aggregate pooling index that captures the extent to which member state bodies move from the unanimity principle towards various forms of majority voting across six decision areas: membership accession, membership suspension, policymaking, budgetary allocation, and non-compliance, as well as constitutional reform. The variable is an aggregate index that ranges from zero to one (from low to high), with an empirical maximum of 0.56, reached by the AU since its 2003 reform.

*Delegation.* We use the same dataset to measure delegation as the extent to which member states empower agents to set the agenda and make the final decision across the same six decision areas. This aggregate index ranges from zero to one (from low to high), with an empirical maximum of 0.65 reached by the European Union with the enactment of the Lisbon Treaty in 2009.

*Policy scope.* This variable counts the number of policy areas from a list of 25 for which an IO is formally responsible each year. To count as an IO policy, the issue is administered by the IO rather than constituting an aggregation of bilateral member state policies, and it is institutionalized in that it leaves a tangible legal, financial, or organizational footprint evidenced in documentation such as treaties, protocols, declarations, etc. (Hooghe et al. 2019).<sup>3</sup>

*Membership scope.* We operationalize the number of IO members with the help of the Correlates of War (COW) International Organizations dataset, which provides annual membership information for the IOs in our sample (Pevehouse et al. 2020). For 2015-2019, we added missing membership information by counting the number of members listed on IO websites.

*Protest.* We operationalize protest against IOs with the help of data generated by keyword searches for the IO name or acronym and the terms “protestor” or “demonstrator” in the Major World Newspapers corpus of the online newspaper database LexisNexis, which includes more than 400 English-language newspapers from all world regions (Tallberg et al. 2013; Dingwerth et al. 2020). We use the logarithmized count of hits per IO year to limit the effect of outliers.

*Media salience (robustness).* We operationalize the media salience of IOs with the help of data generated by keyword searches for the IO name or acronym in the Major World Newspapers corpus of the online newspaper database LexisNexis (Tallberg et al. 2013; Dingwerth et al. 2020). We use the logarithmized count of hits per IO year to limit the effect of outliers.

### *A2.3 Controls*

*Cold War.* We distinguish the pre-and post-Cold War phase by separating our data before and after 1989.

*Economic crises.* Using an approach developed to gauge the effects of economic hardship on international cooperation (Davis and Pelc 2017; Haftel et al. 2020), we construct a measure that captures the severity of economic difficulties in IO member states. To this end, we first utilize data from Laeven and Valencia (2018) to code whether an IO member state was in a banking, currency, or sovereign debt crisis in a given year. Second, we sum the resulting scores for the entire IO membership. Finally, assuming that a crisis is a situation that threatens significant harm to a group of actors and compels a response under time pressure and uncertainty (Lipsy 2020, p. E99), we code an IO year as an economic crisis year if the resulting count of member states in an economic crisis is in the 95<sup>th</sup> percentile for a given IO and decade.

---

<sup>3</sup> The data are available at: <https://garymarks.web.unc.edu/international-authority>

*Security crises.* We apply a similar logic concerning *security crises*. Using the Militarized Interstate Dispute (MID5) dataset compiled by the Correlates of War project (Palmer et al. 2022), this measure uses the count of interstate wars in which IO member states were involved and codes a security crisis when the number of member states in interstate war is in 95<sup>th</sup> percentile of a given IO and decade.

*Type of documents.* This is an indicator variable, showing whether our coding builds exclusively on annual reports, exclusively on communiqués of heads of state and government, or on both types of documents.

### A3 Correlation matrix

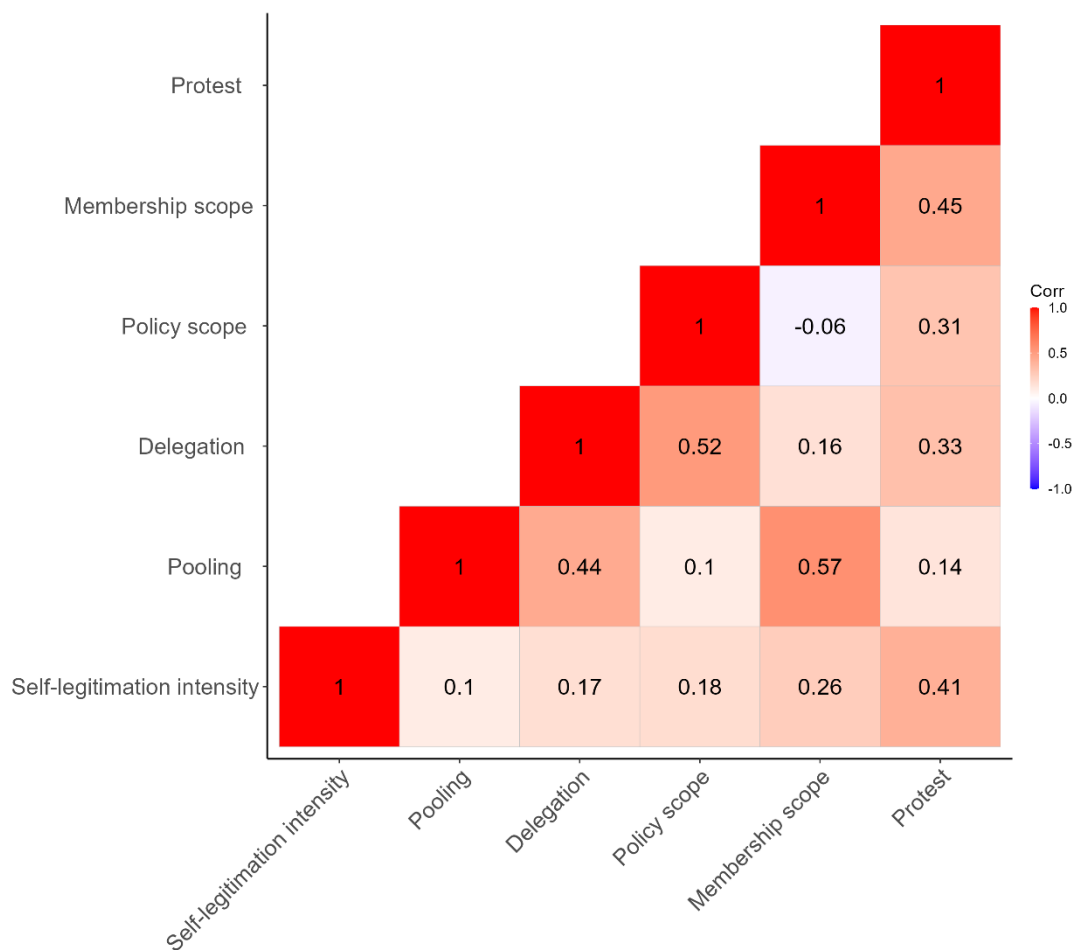



## A4 Robustness checks

**Table A4** Regression analysis of self-legitimation intensity (the original model in the paper)

|                                | Self-legitimation intensity (2-year rolling mean) |                                          |                       |                                    |
|--------------------------------|---------------------------------------------------|------------------------------------------|-----------------------|------------------------------------|
|                                | Reactive<br>(3-year lag)                          | Reactive<br>(3-year lag and<br>controls) | Proactive<br>(no lag) | Proactive<br>(no lag and controls) |
|                                | (M1)                                              | (M2)                                     | (M3)                  | (M4)                               |
| Pooling                        | 0.766***<br>(0.183)                               | 0.615***<br>(0.183)                      | 0.607***<br>(0.147)   | 0.531***<br>(0.151)                |
| Delegation                     | 0.062<br>(0.107)                                  | 0.070<br>(0.107)                         | 0.039<br>(0.102)      | 0.032<br>(0.104)                   |
| Policy scope                   | -0.006<br>(0.004)                                 | -0.008<br>(0.004)                        | 0.002<br>(0.004)      | 0.001<br>(0.004)                   |
| Membership scope               | 0.006*<br>(0.003)                                 | 0.005<br>(0.003)                         | 0.005*<br>(0.002)     | 0.004<br>(0.002)                   |
| Protest                        | 0.004<br>(0.022)                                  | -0.009<br>(0.022)                        |                       |                                    |
| Pooling*Protest                | -0.151*<br>(0.060)                                | -0.147*<br>(0.059)                       |                       |                                    |
| Delegation*Protest             | -0.036<br>(0.055)                                 | -0.043<br>(0.054)                        |                       |                                    |
| Policy scope*Protest           | 0.002<br>(0.002)                                  | 0.003<br>(0.002)                         |                       |                                    |
| Membership scope*Protest       | 0.0004<br>(0.001)                                 | 0.001<br>(0.001)                         |                       |                                    |
| Post-Cold War                  |                                                   | 0.089***<br>(0.020)                      |                       | 0.036<br>(0.020)                   |
| Economic crises                |                                                   | -0.039<br>(0.025)                        |                       | -0.035<br>(0.024)                  |
| Security crises                |                                                   | -0.007<br>(0.024)                        |                       | -0.003<br>(0.024)                  |
| Communiqué missing             | 0.034<br>(0.025)                                  | 0.030<br>(0.025)                         | 0.046<br>(0.025)      | 0.041<br>(0.025)                   |
| Annual report missing          | -0.081***<br>(0.024)                              | -0.073**<br>(0.024)                      | -0.061**<br>(0.023)   | -0.061**<br>(0.023)                |
| IO fixed effects               | Yes                                               | Yes                                      | Yes                   | Yes                                |
| <i>Observations</i>            | 823                                               | 820                                      | 856                   | 851                                |
| <i>R</i> <sup>2</sup>          | 0.088                                             | 0.113                                    | 0.096                 | 0.101                              |
| <i>Adjusted R</i> <sup>2</sup> | 0.044                                             | 0.067                                    | 0.059                 | 0.061                              |

Notes:

\* p < .05; \*\* p < .01; \*\*\* p < .001

OLS fixed effects model using the plm R package, Coefficients with standard errors in parentheses.

**Table A4.1** Change in IO self-legitimation intensity (multi-level model)

|                          | Self-legitimation intensity (2-year rolling mean) |                                               |                               |                                            |
|--------------------------|---------------------------------------------------|-----------------------------------------------|-------------------------------|--------------------------------------------|
|                          | Reactive<br>(3-year lag)<br>(M1)                  | Reactive<br>(3-year lag and controls)<br>(M2) | Proactive<br>(no lag)<br>(M3) | Proactive<br>(no lag and controls)<br>(M4) |
| Pooling                  | 0.481**<br>(0.156)                                | 0.346*<br>(0.155)                             | 0.390**<br>(0.129)            | 0.300*<br>(0.131)                          |
| Delegation               | 0.016<br>(0.101)                                  | 0.030<br>(0.100)                              | -0.003<br>(0.095)             | -0.010<br>(0.096)                          |
| Policy scope             | -0.0002<br>(0.003)                                | -0.002<br>(0.003)                             | 0.006*<br>(0.003)             | 0.005<br>(0.003)                           |
| Membership scope         | 0.003<br>(0.002)                                  | 0.003<br>(0.002)                              | 0.004*<br>(0.002)             | 0.004*<br>(0.002)                          |
| Protest                  | 0.017<br>(0.021)                                  | 0.003<br>(0.021)                              |                               |                                            |
| Pooling*Protest          | -0.153**<br>(0.058)                               | -0.146*<br>(0.057)                            |                               |                                            |
| Delegation*Protest       | -0.034<br>(0.051)                                 | -0.043<br>(0.050)                             |                               |                                            |
| Policy scope*Protest     | 0.002<br>(0.002)                                  | 0.002<br>(0.002)                              |                               |                                            |
| Membership scope*Protest | 0.001<br>(0.001)                                  | 0.001<br>(0.001)                              |                               |                                            |
| Post-Cold War            |                                                   | 0.092***<br>(0.019)                           |                               | 0.046*<br>(0.020)                          |
| Economic crises          |                                                   | -0.041<br>(0.025)                             |                               | -0.035<br>(0.024)                          |
| Security crises          |                                                   | -0.007<br>(0.024)                             |                               | -0.002<br>(0.023)                          |
| Communiqué missing       | 0.030<br>(0.025)                                  | 0.027<br>(0.025)                              | 0.039<br>(0.025)              | 0.035<br>(0.025)                           |
| Annual report missing    | -0.087***<br>(0.023)                              | -0.080***<br>(0.023)                          | -0.070**<br>(0.022)           | -0.070**<br>(0.022)                        |
| Constant                 | 0.269***<br>(0.046)                               | 0.252***<br>(0.046)                           | 0.210***<br>(0.045)           | 0.215***<br>(0.044)                        |
| <i>Observations</i>      | 823                                               | 820                                           | 856                           | 851                                        |
| <i>AIC</i>               | -407.098                                          | -423.842                                      | -430.507                      | -428.150                                   |
| <i>BIC</i>               | -341.116                                          | -343.783                                      | -387.737                      | -371.193                                   |

Multi-level model using the lme4 R package, Coefficients with standard errors in parentheses.

\*p < .05; \*\*p < .01; \*\*\*p < .001

**Table A4.2** Change in IO self-legitimation intensity (no rolling mean)

|                                | Self-legitimation intensity   |                                            |                            |                                         |
|--------------------------------|-------------------------------|--------------------------------------------|----------------------------|-----------------------------------------|
|                                | Reactive (3-year lag)<br>(M1) | Reactive (3-year lag and controls)<br>(M2) | Proactive (no lag)<br>(M3) | Proactive (no lag and controls)<br>(M4) |
| Pooling                        | 0.632**<br>(0.217)            | 0.484*<br>(0.219)                          | 0.600***<br>(0.174)        | 0.530**<br>(0.180)                      |
| Delegation                     | 0.123<br>(0.126)              | 0.132<br>(0.127)                           | 0.079<br>(0.119)           | 0.055<br>(0.121)                        |
| Policy scope                   | -0.004<br>(0.005)             | -0.007<br>(0.005)                          | 0.001<br>(0.004)           | 0.001<br>(0.004)                        |
| Membership scope               | 0.004<br>(0.003)              | 0.002<br>(0.003)                           | 0.004<br>(0.003)           | 0.004<br>(0.003)                        |
| Protest                        | -0.017<br>(0.026)             | -0.031<br>(0.026)                          |                            |                                         |
| Pooling*Protest                | -0.150*<br>(0.071)            | -0.145*<br>(0.071)                         |                            |                                         |
| Delegation*Protest             | -0.061<br>(0.066)             | -0.069<br>(0.065)                          |                            |                                         |
| Policy scope*Protest           | 0.004<br>(0.002)              | 0.004*<br>(0.002)                          |                            |                                         |
| Membership scope*Protest       | 0.001<br>(0.001)              | 0.001<br>(0.001)                           |                            |                                         |
| Post-Cold War                  |                               | 0.086***<br>(0.024)                        |                            | 0.028<br>(0.024)                        |
| Economic crises                |                               | -0.069*<br>(0.030)                         |                            | -0.053<br>(0.029)                       |
| Security crises                |                               | -0.013<br>(0.029)                          |                            | -0.008<br>(0.028)                       |
| Communiqué missing             | 0.039<br>(0.030)              | 0.035<br>(0.030)                           | 0.048<br>(0.030)           | 0.042<br>(0.030)                        |
| Annual report missing          | -0.097***<br>(0.028)          | -0.088**<br>(0.028)                        | -0.078**<br>(0.026)        | -0.076**<br>(0.027)                     |
| IO fixed effects               | Yes                           | Yes                                        | Yes                        | Yes                                     |
| <i>Observations</i>            | 864                           | 860                                        | 898                        | 891                                     |
| <i>R</i> <sup>2</sup>          | 0.062                         | 0.080                                      | 0.071                      | 0.073                                   |
| <i>Adjusted R</i> <sup>2</sup> | 0.019                         | 0.034                                      | 0.035                      | 0.034                                   |

Multi-level model using the lme4 R package, Coefficients with standard errors in parentheses.

\* p < .05; \*\* p < .01; \*\*\* p < .001

**Table A4.3** Change in IO self-legitimation intensity (3-year rolling mean)

|                                | Self-legitimation intensity (3-year rolling mean) |                                    |                     |                                 |
|--------------------------------|---------------------------------------------------|------------------------------------|---------------------|---------------------------------|
|                                | Reactive (3-year lag)                             | Reactive (3-year lag and controls) | Proactive (no lag)  | Proactive (no lag and controls) |
|                                | (M1)                                              | (M2)                               | (M3)                | (M4)                            |
| Pooling                        | 0.758***<br>(0.165)                               | 0.622***<br>(0.166)                | 0.671***<br>(0.135) | 0.628***<br>(0.138)             |
| Delegation                     | 0.033<br>(0.098)                                  | 0.042<br>(0.098)                   | 0.065<br>(0.097)    | 0.061<br>(0.098)                |
| Policy scope                   | -0.004<br>(0.004)                                 | -0.006<br>(0.004)                  | 0.002<br>(0.003)    | 0.0005<br>(0.003)               |
| Membership scope               | 0.007**<br>(0.003)                                | 0.006*<br>(0.003)                  | 0.005*<br>(0.002)   | 0.004<br>(0.002)                |
| Protest                        | 0.007<br>(0.020)                                  | -0.006<br>(0.020)                  |                     |                                 |
| Pooling*Protest                | -0.140**<br>(0.054)                               | -0.133*<br>(0.054)                 |                     |                                 |
| Delegation*Protest             | -0.046<br>(0.049)                                 | -0.053<br>(0.048)                  |                     |                                 |
| Policy scope*Protest           | 0.002<br>(0.001)                                  | 0.003<br>(0.001)                   |                     |                                 |
| Membership scope*Protest       | 0.0003<br>(0.001)                                 | 0.001<br>(0.001)                   |                     |                                 |
| Post-Cold War                  |                                                   | 0.077***<br>(0.018)                |                     | 0.026<br>(0.019)                |
| Economic crises                |                                                   | -0.028<br>(0.022)                  |                     | -0.035<br>(0.022)               |
| Security crises                |                                                   | -0.005<br>(0.022)                  |                     | 0.0002<br>(0.022)               |
| Communiqué missing             | 0.019<br>(0.023)                                  | 0.020<br>(0.023)                   | 0.035<br>(0.023)    | 0.034<br>(0.023)                |
| Annual report missing          | -0.095***<br>(0.022)                              | -0.086***<br>(0.022)               | -0.068**<br>(0.022) | -0.067**<br>(0.022)             |
| IO fixed effects               | Yes                                               | Yes                                | Yes                 | Yes                             |
| <i>Observations</i>            | 804                                               | 803                                | 822                 | 821                             |
| <i>R</i> <sup>2</sup>          | 0.125                                             | 0.144                              | 0.127               | 0.129                           |
| <i>Adjusted R</i> <sup>2</sup> | 0.081                                             | 0.098                              | 0.090               | 0.089                           |

OLS fixed effects model using the plm R package, Coefficients with standard errors in parentheses.  
 \* p < .05; \*\* p < .01; \*\*\* p < .001

**Table A4.4 Change in IO self-legitimation intensity ((log) intensity, 2-year rolling mean)**

|                                | Self-legitimation intensity (log 2-year rolling mean) |                                       |                       |                                    |
|--------------------------------|-------------------------------------------------------|---------------------------------------|-----------------------|------------------------------------|
|                                | Reactive<br>(3-year<br>lag)                           | Reactive (3-year lag<br>and controls) | Proactive (no<br>lag) | Proactive (no lag and<br>controls) |
|                                | (M1)                                                  | (M2)                                  | (M3)                  | (M4)                               |
| Pooling                        | 1.921***<br>(0.367)                                   | 1.590***<br>(0.366)                   | 1.570***<br>(0.293)   | 1.391***<br>(0.301)                |
| Delegation                     | 0.236<br>(0.214)                                      | 0.209<br>(0.214)                      | 0.203<br>(0.204)      | 0.148<br>(0.207)                   |
| Policy scope                   | -0.012<br>(0.008)                                     | -0.014<br>(0.008)                     | -0.003<br>(0.007)     | -0.004<br>(0.007)                  |
| Membership scope               | 0.009<br>(0.006)                                      | 0.006<br>(0.006)                      | 0.008<br>(0.005)      | 0.006<br>(0.005)                   |
| Protest                        | -0.001<br>(0.044)                                     | -0.027<br>(0.044)                     |                       |                                    |
| Pooling*Protest                | -0.282*<br>(0.121)                                    | -0.272*<br>(0.119)                    |                       |                                    |
| Delegation*Protest             | -0.017<br>(0.110)                                     | -0.027<br>(0.108)                     |                       |                                    |
| Policy scope*Protest           | 0.003<br>(0.003)                                      | 0.003<br>(0.003)                      |                       |                                    |
| Membership scope*Protest       | 0.001<br>(0.001)                                      | 0.001<br>(0.001)                      |                       |                                    |
| Post-Cold War                  |                                                       | 0.189***<br>(0.040)                   |                       | 0.086*<br>(0.041)                  |
| Economic crises                |                                                       | -0.094<br>(0.050)                     |                       | -0.080<br>(0.048)                  |
| Security crises                |                                                       | -0.040<br>(0.048)                     |                       | -0.033<br>(0.047)                  |
| Communiqué missing             | 0.018<br>(0.051)                                      | 0.006<br>(0.050)                      | 0.047<br>(0.050)      | 0.033<br>(0.050)                   |
| Annual report missing          | -0.213***<br>(0.048)                                  | -0.196***<br>(0.048)                  | -0.162***<br>(0.046)  | -0.162***<br>(0.046)               |
| IO fixed effects               | Yes                                                   | Yes                                   | Yes                   | Yes                                |
| <i>Observations</i>            | 823                                                   | 820                                   | 856                   | 851                                |
| <i>R</i> <sup>2</sup>          | 0.111                                                 | 0.140                                 | 0.116                 | 0.123                              |
| <i>Adjusted R</i> <sup>2</sup> | 0.068                                                 | 0.095                                 | 0.080                 | 0.084                              |

OLS fixed effects model using the plm R package, Coefficients with standard errors in parentheses.

\* p < .05; \*\* p < .01; \*\*\* p < .001

**Table A4.5 Change in IO self-legitimation intensity (1-year lead for proactive models)**

|                                | Self-legitimation intensity (2-year rolling mean) |                                    |                         |                                      |
|--------------------------------|---------------------------------------------------|------------------------------------|-------------------------|--------------------------------------|
|                                | Reactive (3-year lag)                             | Reactive (3-year lag and controls) | Proactive (1-year lead) | Proactive (1-year lead and controls) |
|                                | (M1)                                              | (M2)                               | (M3)                    | (M4)                                 |
| Pooling                        | 0.766***<br>(0.183)                               | 0.615***<br>(0.183)                | 0.716***<br>(0.147)     | 0.645***<br>(0.152)                  |
| Delegation                     | 0.062<br>(0.107)                                  | 0.070<br>(0.107)                   | 0.053<br>(0.104)        | 0.053<br>(0.107)                     |
| Policy scope                   | -0.006<br>(0.004)                                 | -0.008<br>(0.004)                  | 0.002<br>(0.004)        | 0.003<br>(0.004)                     |
| Membership scope               | 0.006*<br>(0.003)                                 | 0.005<br>(0.003)                   | 0.003<br>(0.002)        | 0.003<br>(0.002)                     |
| Protest                        | 0.004<br>(0.022)                                  | -0.009<br>(0.022)                  |                         |                                      |
| Pooling*Protest                | -0.151*<br>(0.060)                                | -0.147*<br>(0.059)                 |                         |                                      |
| Delegation*Protest             | -0.036<br>(0.055)                                 | -0.043<br>(0.054)                  |                         |                                      |
| Policy scope*Protest           | 0.002<br>(0.002)                                  | 0.003<br>(0.002)                   |                         |                                      |
| Membership scope*Protest       | 0.0004<br>(0.001)                                 | 0.001<br>(0.001)                   |                         |                                      |
| Post-Cold War                  |                                                   | 0.089***<br>(0.020)                |                         | 0.018<br>(0.021)                     |
| Economic crises                |                                                   | -0.039<br>(0.025)                  |                         | -0.034<br>(0.024)                    |
| Security crises                |                                                   | -0.007<br>(0.024)                  |                         | -0.002<br>(0.023)                    |
| Communiqué missing             | 0.034<br>(0.025)                                  | 0.030<br>(0.025)                   | 0.050*<br>(0.025)       | 0.045<br>(0.025)                     |
| Annual report missing          | -0.081***<br>(0.024)                              | -0.073**<br>(0.024)                | -0.056*<br>(0.023)      | -0.056*<br>(0.023)                   |
| IO fixed effects               | Yes                                               | Yes                                | Yes                     | Yes                                  |
| <i>Observations</i>            | 823                                               | 820                                | 860                     | 853                                  |
| <i>R</i> <sup>2</sup>          | 0.088                                             | 0.113                              | 0.103                   | 0.109                                |
| <i>Adjusted R</i> <sup>2</sup> | 0.044                                             | 0.067                              | 0.067                   | 0.069                                |

OLS fixed effects model using the plm R package, Coefficients with standard errors in parentheses.  
 \* p < .05; \*\* p < .01; \*\*\* p < .001

**Table A4.6 Change in IO self-legitimation intensity (2-year lag for reactive models)**

|                                | Self-legitimation intensity (2-year rolling mean) |                                    |                     |                                 |
|--------------------------------|---------------------------------------------------|------------------------------------|---------------------|---------------------------------|
|                                | Reactive (2-year lag)                             | Reactive (2-year lag and controls) | Proactive (no lag)  | Proactive (no lag and controls) |
|                                | (M1)                                              | (M2)                               | (M3)                | (M4)                            |
| Pooling                        | 0.708***<br>(0.181)                               | 0.579**<br>(0.183)                 | 0.607***<br>(0.147) | 0.531***<br>(0.151)             |
| Delegation                     | 0.064<br>(0.106)                                  | 0.068<br>(0.107)                   | 0.039<br>(0.102)    | 0.032<br>(0.104)                |
| Policy scope                   | -0.003<br>(0.004)                                 | -0.005<br>(0.004)                  | 0.002<br>(0.004)    | 0.001<br>(0.004)                |
| Membership scope               | 0.007*<br>(0.003)                                 | 0.006<br>(0.003)                   | 0.005*<br>(0.002)   | 0.004<br>(0.002)                |
| Protest                        | -0.013<br>(0.021)                                 | -0.024<br>(0.021)                  |                     |                                 |
| Pooling*Protest                | -0.146*<br>(0.059)                                | -0.147*<br>(0.059)                 |                     |                                 |
| Delegation*Protest             | -0.077<br>(0.054)                                 | -0.081<br>(0.053)                  |                     |                                 |
| Policy scope*Protest           | 0.004*<br>(0.002)                                 | 0.004*<br>(0.002)                  |                     |                                 |
| Membership scope*Protest       | 0.001<br>(0.001)                                  | 0.001<br>(0.001)                   |                     |                                 |
| Post-Cold War                  |                                                   | 0.072***<br>(0.020)                |                     | 0.036<br>(0.020)                |
| Economic crises                |                                                   | -0.027<br>(0.024)                  |                     | -0.035<br>(0.024)               |
| Security crises                |                                                   | -0.006<br>(0.023)                  |                     | -0.003<br>(0.024)               |
| Communiqué missing             | 0.038<br>(0.025)                                  | 0.032<br>(0.025)                   | 0.046<br>(0.025)    | 0.041<br>(0.025)                |
| Annual report missing          | -0.072**<br>(0.024)                               | -0.068**<br>(0.024)                | -0.061**<br>(0.023) | -0.061**<br>(0.023)             |
| IO fixed effects               | Yes                                               | Yes                                | Yes                 | Yes                             |
| <i>Observations</i>            | 842                                               | 839                                | 856                 | 851                             |
| <i>R</i> <sup>2</sup>          | 0.097                                             | 0.114                              | 0.096               | 0.101                           |
| <i>Adjusted R</i> <sup>2</sup> | 0.054                                             | 0.068                              | 0.059               | 0.061                           |

OLS fixed effects model using the plm R package, Coefficients with standard errors in parentheses.  
 \* p < .05; \*\* p < .01; \*\*\* p < .001

**Table A4.7 Change in IO self-legitimation intensity (3-year lag for authority and 2-year lag for protest in reactive models)**

|                                | Self-legitimation intensity (2-year rolling mean)           |                                                                            |                     |                                 |
|--------------------------------|-------------------------------------------------------------|----------------------------------------------------------------------------|---------------------|---------------------------------|
|                                | Reactive (3-year lag for authority, 2-year lag for protest) | Reactive ((3-year lag for authority, 2-year lag for protest, and controls) | Proactive (no lag)  | Proactive (no lag and controls) |
|                                | (M1)                                                        | (M2)                                                                       | (M3)                | (M4)                            |
| Pooling                        | 0.796***<br>(0.183)                                         | 0.661***<br>(0.184)                                                        | 0.607***<br>(0.147) | 0.531***<br>(0.151)             |
| Delegation                     | 0.062<br>(0.106)                                            | 0.065<br>(0.107)                                                           | 0.039<br>(0.102)    | 0.032<br>(0.104)                |
| Policy scope                   | -0.007<br>(0.004)                                           | -0.008*<br>(0.004)                                                         | 0.002<br>(0.004)    | 0.001<br>(0.004)                |
| Membership scope               | 0.006*<br>(0.003)                                           | 0.005<br>(0.003)                                                           | 0.005*<br>(0.002)   | 0.004<br>(0.002)                |
| Protest                        | -0.007<br>(0.021)                                           | -0.020<br>(0.021)                                                          |                     |                                 |
| Pooling*Protest                | -0.151*<br>(0.061)                                          | -0.153*<br>(0.060)                                                         |                     |                                 |
| Delegation*Protest             | -0.039<br>(0.055)                                           | -0.043<br>(0.054)                                                          |                     |                                 |
| Policy scope*Protest           | 0.003<br>(0.002)                                            | 0.003*<br>(0.002)                                                          |                     |                                 |
| Membership scope*Protest       | 0.0004<br>(0.001)                                           | 0.001<br>(0.001)                                                           |                     |                                 |
| Post-Cold War                  |                                                             | 0.083***<br>(0.020)                                                        |                     | 0.036<br>(0.020)                |
| Economic crises                |                                                             | -0.032<br>(0.024)                                                          |                     | -0.035<br>(0.024)               |
| Security crises                |                                                             | -0.004<br>(0.024)                                                          |                     | -0.003<br>(0.024)               |
| Communiqué missing             | 0.037<br>(0.025)                                            | 0.033<br>(0.025)                                                           | 0.046<br>(0.025)    | 0.041<br>(0.025)                |
| Annual report missing          | -0.081***<br>(0.024)                                        | -0.073**<br>(0.024)                                                        | -0.061**<br>(0.023) | -0.061**<br>(0.023)             |
| IO fixed effects               | Yes                                                         | Yes                                                                        | Yes                 | Yes                             |
| <i>Observations</i>            | 835                                                         | 832                                                                        | 856                 | 851                             |
| <i>R</i> <sup>2</sup>          | 0.093                                                       | 0.115                                                                      | 0.096               | 0.101                           |
| <i>Adjusted R</i> <sup>2</sup> | 0.050                                                       | 0.069                                                                      | 0.059               | 0.061                           |

OLS fixed effects model using the plm R package, Coefficients with standard errors in parentheses.  
\* p < .05; \*\* p < .01; \*\*\* p < .001



**Table A4.8 Change in IO self-legitimation intensity (salience instead of protest)**

|                                | Self-legitimation intensity (2-year rolling mean) |                                        |                       |                                    |
|--------------------------------|---------------------------------------------------|----------------------------------------|-----------------------|------------------------------------|
|                                | Reactive (3-<br>year lag)                         | Reactive ((3-year<br>lag and controls) | Proactive<br>(no lag) | Proactive (no lag<br>and controls) |
|                                | (M1)                                              | (M2)                                   | (M3)                  | (M4)                               |
| Pooling                        | 0.690***<br>(0.179)                               | 0.545**<br>(0.180)                     | 0.607***<br>(0.147)   | 0.531***<br>(0.151)                |
| Delegation                     | -0.005<br>(0.106)                                 | 0.011<br>(0.107)                       | 0.039<br>(0.102)      | 0.032<br>(0.104)                   |
| Policy scope                   | -0.004<br>(0.004)                                 | -0.006<br>(0.004)                      | 0.002<br>(0.004)      | 0.001<br>(0.004)                   |
| Membership scope               | 0.004<br>(0.003)                                  | 0.003<br>(0.003)                       | 0.005*<br>(0.002)     | 0.004<br>(0.002)                   |
| Salience                       | 0.022<br>(0.024)                                  | -0.002<br>(0.025)                      |                       |                                    |
| Pooling*Salience               | -0.037<br>(0.058)                                 | -0.037<br>(0.058)                      |                       |                                    |
| Delegation* Salience           | 0.111*<br>(0.055)                                 | 0.090<br>(0.055)                       |                       |                                    |
| Policy scope* Salience         | -0.001<br>(0.002)                                 | -0.0002<br>(0.002)                     |                       |                                    |
| Membership scope* Salience     | -0.001<br>(0.001)                                 | -0.0003<br>(0.001)                     |                       |                                    |
| Post-Cold War                  |                                                   | 0.086***<br>(0.021)                    |                       | 0.036<br>(0.020)                   |
| Economic crises                |                                                   | -0.041<br>(0.025)                      |                       | -0.035<br>(0.024)                  |
| Security crises                |                                                   | -0.004<br>(0.024)                      |                       | -0.003<br>(0.024)                  |
| Communiqué missing             | 0.037<br>(0.025)                                  | 0.033<br>(0.025)                       | 0.046<br>(0.025)      | 0.041<br>(0.025)                   |
| Annual report missing          | -0.089***<br>(0.024)                              | -0.080***<br>(0.024)                   | -0.061**<br>(0.023)   | -0.061**<br>(0.023)                |
| IO fixed effects               | Yes                                               | Yes                                    | Yes                   | Yes                                |
| <i>Observations</i>            | 823                                               | 820                                    | 856                   | 851                                |
| <i>R</i> <sup>2</sup>          | 0.089                                             | 0.111                                  | 0.096                 | 0.101                              |
| <i>Adjusted R</i> <sup>2</sup> | 0.045                                             | 0.065                                  | 0.059                 | 0.061                              |

OLS fixed effects model using the plm R package, Coefficients with standard errors in parentheses.  
\* p < .05; \*\* p < .01; \*\*\* p < .001

## References

- Binder, M., & Heupel, M. (2021). The Politics of Legitimation in International Organizations. *Journal of Global Security Studies*, 6(3), 1–18. <https://doi.org/10.1093/jogss/ogaa033>
- Davis, C. L., & Pelc, K. J. (2017). Cooperation in Hard Times: Self-restraint of Trade Protection. *Journal of Conflict Resolution*, 61(2), 398–429. <https://doi.org/10.1177/0022002715595699>
- Dellmuth, L. M., Scholte, J. A., & Tallberg, J. (2019). Institutional Sources of Legitimacy for International Organisations: Beyond Procedure versus Performance. *Review of International Studies*, 45(4), 1–20. <https://doi.org/10.1017/S026021051900007X>
- Dingwerth, K., Schmidtke, H., & Weise, T. (2020). The Rise of Democratic Legitimation: Why International Organizations Speak the Language of Democracy. *European Journal of International Relations*, 26(2), 714–741. <https://doi.org/10.1177/1354066119882488>
- Dingwerth, K., Witt, A., Lehmann, I., Reichel, E., & Weise, T. (2019). *International Organizations under Pressure: Legitimizing Global Governance in a Changing World*. Oxford: Oxford University Press.
- Haftel, Y. Z., & Lenz, T. (2022). Measuring Institutional Overlap in Global Governance. *The Review of International Organizations*, 17(1), 323–347. <https://doi.org/10.1007/s11558-021-09415-3>
- Haftel, Y. Z., Wajner, D. F., & Eran, D. (2020). The Short and Long(er) of It: The Effect of Hard Times on Regional Institutionalization. *International Studies Quarterly*, 64(4), 808–820. <https://doi.org/10.1093/isq/sqaa057>
- Hooghe, L., Lenz, T., & Marks, G. (2019). *A theory of international organization*. Oxford: Oxford University Press.
- Laeven, L., & Valencia, F. (2018). Systemic Banking Crises Revisited. *IMF Working Papers*, 18(206), 1–47.

- Lenz, T., Schmidtke, H., Krösche, N., & Schirmer, S. (2022). Legitimation Strategies of Regional Organizations (LegRO). Germany: GESIS. <https://doi.org/10.7802/2450>
- Lipsy, P. Y. (2020). COVID-19 and the Politics of Crisis. *International Organization*, 74(S1), E98–E127. <https://doi.org/10.1017/S0020818320000375>
- Palmer, G., McManus, R. W., D’Orazio, V., Kenwick, M. R., Karstens, M., Bloch, C., et al. (2022). The MID5 Dataset, 2011–2014: Procedures, Coding Rules, and Description. *Conflict Management and Peace Science*, 39(4), 470–482. <https://doi.org/10.1177/0738894221995743>
- Pevehouse, J. C. W., Nordstrom, T., McManus, R. W., & Jamison, A. S. (2020). Tracking Organizations in the World: The Correlates of War IGO Version 3.0 Datasets. *Journal of Peace Research*, 57(3), 492–503. <https://doi.org/10.1177/0022343319881175>
- Schmidtke, H., Schirmer, S., Krösche, N., & Lenz, T. (2023). The Legitimation of International Organizations: Introducing a New Dataset. *International Studies Perspectives* (forthcoming).
- Schneider, S., Hurrelmann, A., Krell-Laluhova, Z., Nullmeier, F., & Wiesner, A. (2010). *Democracy’s Deep Roots. Why the Nation State Remains Legitimate*. Basingstoke: Palgrave Macmillan.
- Tallberg, J., Sommerer, T., Squatrito, T., & Jönsson, C. (2013). *The Opening Up of International Organizations: Transnational Access in Global Governance*. Cambridge: Cambridge University Press.
- Tallberg, J., & Zürn, M. (2019). The Legitimacy and Legitimation of International Organizations: Introduction and Framework. *The Review of International Organizations*, 14(4), 581–606. <https://doi.org/10.1007/s11558-018-9330-7>
